# Supplementary material for: Selective oxidative stress induces dual damage to telomeres and mitochondria in human T cells
Source: PubMed Central journal article supplement (PMC8672791; doi:10.1111/acel.13513), 2021-11-09

**Fig.S1****a**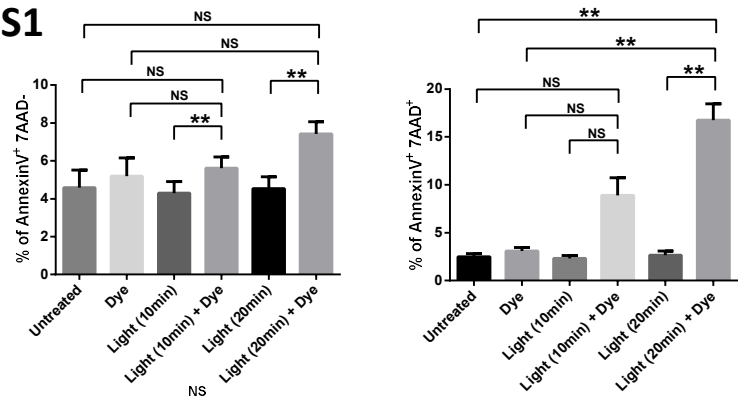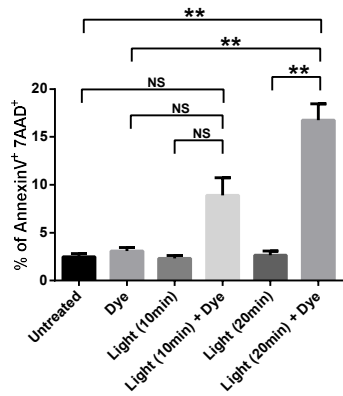**b**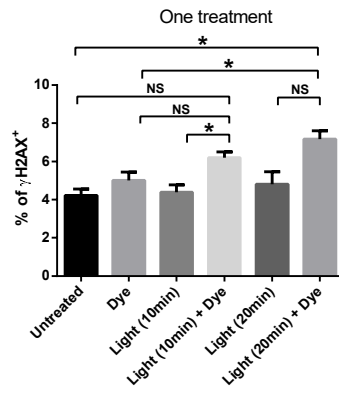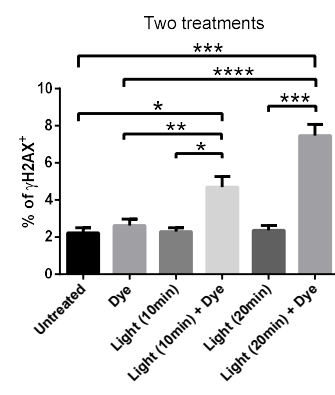**c**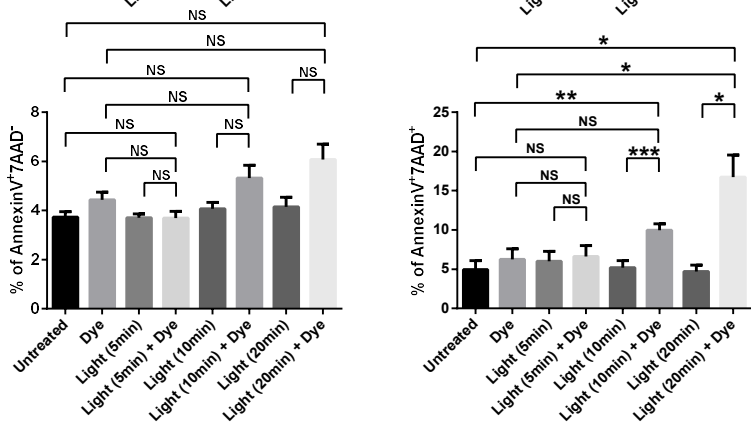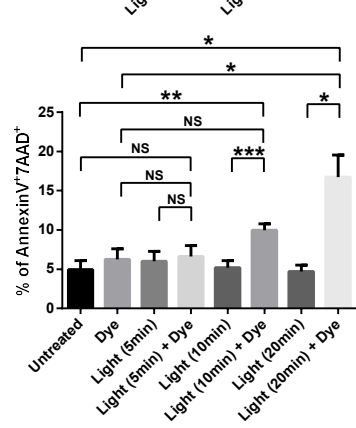**d**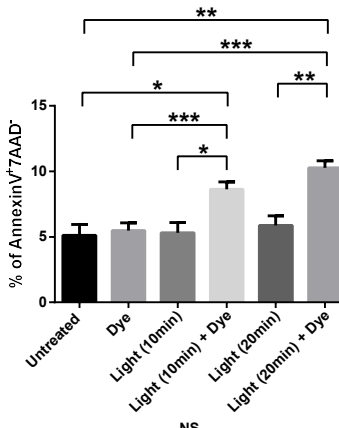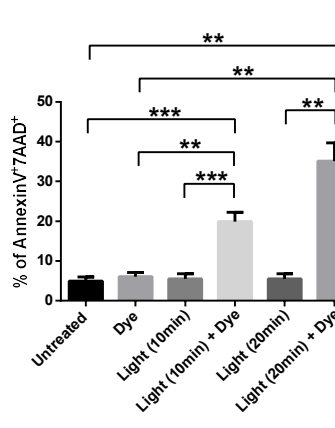**e**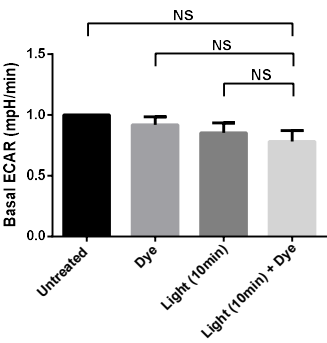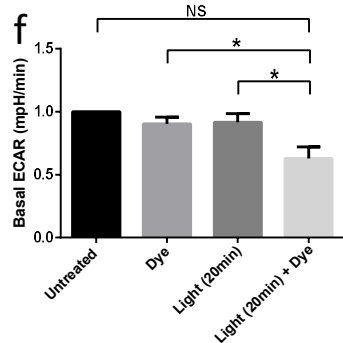**g**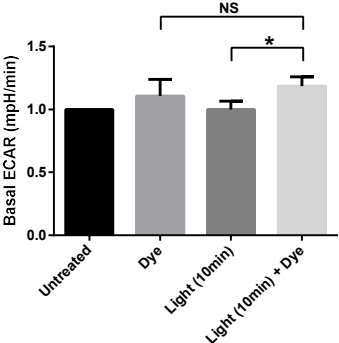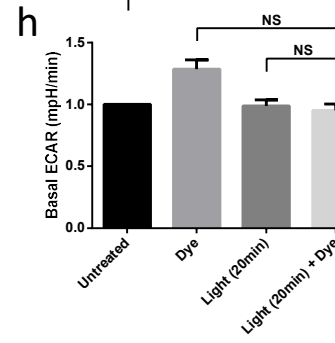

**Fig.S2**

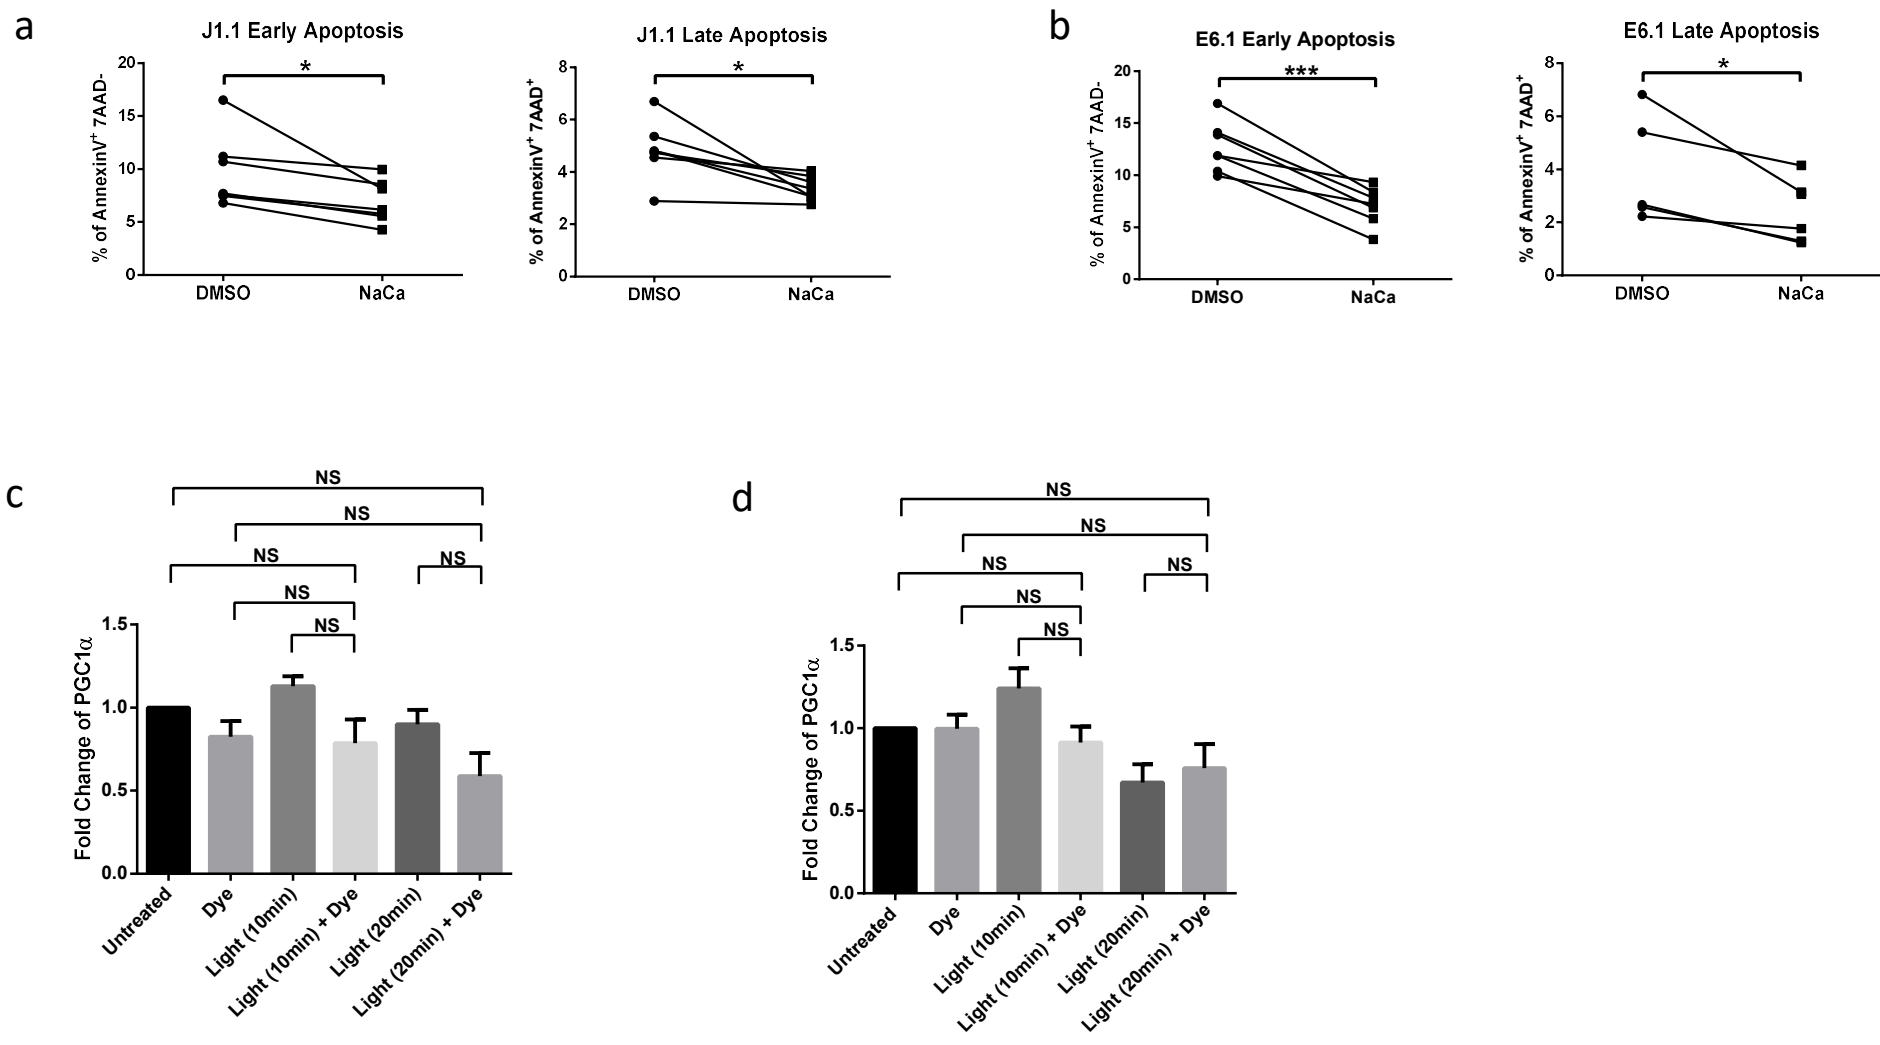

Supplement: ACEL-20-e13513-s001.pdf [file ACEL-20-e13513-s001.pdf]
